# Supplementary material for: Long noncoding RNA expression profile changes associated with dietary energy in the sheep testis during sexual maturation
Source: PubMed Central journal article supplement (PMC5507887; doi:10.1038/s41598-017-05443-5), 2017-07-12
Supplement: 41598_2017_5443_MOESM1_ESM.pdf [file 41598_2017_5443_MOESM1_ESM.pdf]

1 **Long noncoding RNA expression profile changes**  
2 **associated with dietary energy in the sheep testis**  
3 **during sexual maturation**

4 Yanli Zhang<sup>1</sup>, Hua Yang<sup>1</sup>, Le Han<sup>1</sup>, Fengzhe Li<sup>1</sup>, Tingting Zhang<sup>1</sup>, Jing  
5 Pang<sup>1</sup>, Xu Feng<sup>1</sup>, Caifang Ren<sup>1</sup>, Shengyong Mao<sup>2</sup>, Feng Wang<sup>1</sup>

6

7 <sup>1</sup>Jiangsu Livestock Embryo Engineering Laboratory, Nanjing Agricultural  
8 University, Nanjing 210095, China

9 <sup>2</sup>Jiangsu Key Laboratory of Gastrointestinal Nutrition and Animal Health,  
10 Nanjing Agricultural University, Nanjing 210095, China

11

12 Correspondence and requests for materials should be addressed to F.W.

13 (email: [caeet@njau.edu.cn](mailto:caeet@njau.edu.cn))

**Table S1. Alignment of statistical results of reads.**

| Group                    | Sample | Effective reads   | Total mapped       | Multiple mapped  | Uniquely mapped    | Read1 mapped       | Read2 mapped       | Reads map to '+'   | Reads map to '-'   |
|--------------------------|--------|-------------------|--------------------|------------------|--------------------|--------------------|--------------------|--------------------|--------------------|
| Hay group<br>(Hay)       | Hay1   | 94,146,578(100%)  | 78,725,626(83.62%) | 6,601,523(7.01%) | 72,124,103(76.61%) | 40,199,831(42.7%)  | 38,525,795(40.92%) | 39,153,438(41.59%) | 39,572,188(42.03%) |
|                          | Hay2   | 119,497,828(100%) | 98,211,257(82.19%) | 7,429,524(6.22%) | 90,781,733(75.97%) | 50,152,567(41.97%) | 48,058,690(40.22%) | 48,824,390(40.86%) | 49,386,867(41.33%) |
|                          | Hay3   | 91,938,416(100%)  | 75,501,163(82.12%) | 5,122,021(5.57%) | 70,379,142(76.55%) | 38,569,661(41.95%) | 36,931,502(40.17%) | 37,533,221(40.82%) | 37,967,942(41.3%)  |
| High grain<br>group (HG) | HG1    | 98,143,376(100%)  | 83,794,371(85.38%) | 4,749,342(4.84%) | 79,045,029(80.54%) | 43,016,784(43.83%) | 40,777,587(41.55%) | 41,656,028(42.44%) | 42,138,343(42.94%) |
|                          | HG2    | 88,924,920(100%)  | 70,922,735(79.76%) | 4,958,980(5.58%) | 65,963,755(74.18%) | 36,247,314(40.76%) | 34,675,421(38.99%) | 35,267,393(39.66%) | 35,655,342(40.1%)  |
|                          | HG3    | 104,347,880(100%) | 87,386,506(83.75%) | 7,016,186(6.72%) | 80,370,320(77.02%) | 44,683,751(42.82%) | 42,702,755(40.92%) | 43,435,681(41.63%) | 43,950,825(42.12%) |

15 1) Effective reads: The number of clean reads.

16 2) Total mapped: The number of sequences matched to the genome.

17 3) Multiple mapped: The number of sequences that had multiple positions mapped to the reference sequence.

18 4) Uniquely mapped: The number of sequences that had unique positions mapped to the reference sequence.

19 5) Read-1, Read-2 mapped: The number of read-1 and read-2 that locate on the genome; the statistical proportion of the two parts should be substantially the same.

20 6) Reads map to '+': The number of reads mapped to the positive strand of the genome.

21 7) Reads map to '-': The number of reads mapped to the negative strand of the genome.

**Table S2. DE genes and co-expressed lncRNAs detected in different cell types during sheep spermatogenesis identified by referring to mouse RNA-seq data**

| Gene  | Up-/down regulated | Chromosomal location | Strand | Mouse chromosomal location | Cell-type location                                | <i>cis</i> or <i>trans</i> relationship | Co-expressed lncRNAs | Up-/down regulated | Chromosomal location | Strand |
|-------|--------------------|----------------------|--------|----------------------------|---------------------------------------------------|-----------------------------------------|----------------------|--------------------|----------------------|--------|
| IL5RA | Down               | Chr19                | +      | Chr6                       | priSG-A; plpSC;<br>rST; eST                       | <i>trans</i><br><i>trans</i>            | LOC105604050         | Up                 | Chr21                | +      |
|       |                    |                      |        |                            |                                                   |                                         | LOC106991431         | Down               | Chr11                | -      |
| OAS2  | Up                 | Chr17                | -      | Chr5                       | priSG-A; SG-A;<br>SG-B; plpSC;<br>pacSC; rST; eST | <i>trans</i><br><i>trans</i>            | LOC105610224         | Down               | Chr12                | +      |
|       |                    |                      |        |                            |                                                   |                                         | LOC105613170         | Down               | Chr12                | +      |
| PROZ  | Down               | Chr10                | +      | Chr8                       | priSG-A; SG-A;<br>SG-B; plpSC;<br>pacSC; rST; eST | <i>cis</i>                              | LOC105607399         | Down               | Chr10                | -      |
| TSHZ2 | Down               | Chr13                | +      | Chr2                       | priSG-A; SG-A;<br>SG-B; plpSC;<br>pacSC; rST; eST | <i>cis</i>                              | LOC105608654         | Down               | Chr13                | -      |

priSG-A, primitive type A spermatogonia; SG-A, type A spermatogonia; plpSC; SG-B, type B spermatogonia; plpSC, preleptotene spermatocytes; pacSC, pachytene spermatocytes; rST; round spermatids; eST, elongating spermatids.

**Table S3. Diet formulas of the two groups.**

| Item                              | Diet         |                  |
|-----------------------------------|--------------|------------------|
|                                   | Hay group    | High grain group |
| <b>Ingredient composition %DM</b> |              |                  |
| Oat hay                           | <b>66.67</b> | <b>26.67</b>     |
| Alfalfa                           | <b>33.33</b> | <b>13.33</b>     |
| Corn meal                         | <b>0</b>     | <b>34.2</b>      |
| Wheat meal                        | <b>0</b>     | <b>18</b>        |
| Soybean                           | <b>0</b>     | <b>4.2</b>       |
| CaCO3                             | <b>0</b>     | <b>1.08</b>      |
| NaCl, salt                        | <b>0</b>     | <b>0.42</b>      |
| CaHPO4                            | <b>0</b>     | <b>1.2</b>       |
| Mineral and vitamin supplement    | <b>0</b>     | <b>0.9</b>       |
| <b>Nutrient composition</b>       |              |                  |
| Metabolic energy, MJ/kg DM        | <b>7.24</b>  | <b>14.79</b>     |
| Crude protein, % DM               | <b>12.30</b> | <b>12.04</b>     |
| Crude fat, % DM                   | <b>3.39</b>  | <b>3.45</b>      |
| Crude fiber, % DM                 | <b>28.94</b> | <b>12.51</b>     |
| Neutral detergent fiber, % DM     | <b>53.60</b> | <b>27.38</b>     |
| Acid detergent fiber, % DM        | <b>33.41</b> | <b>15.57</b>     |
| Crude ash, % DM                   | <b>7.87</b>  | <b>6.71</b>      |
| Starch, % DM                      | <b>2.03</b>  | <b>31.58</b>     |
| Ca, % DM                          | <b>0.79</b>  | <b>1.02</b>      |
| P, % DM                           | <b>0.30</b>  | <b>0.49</b>      |

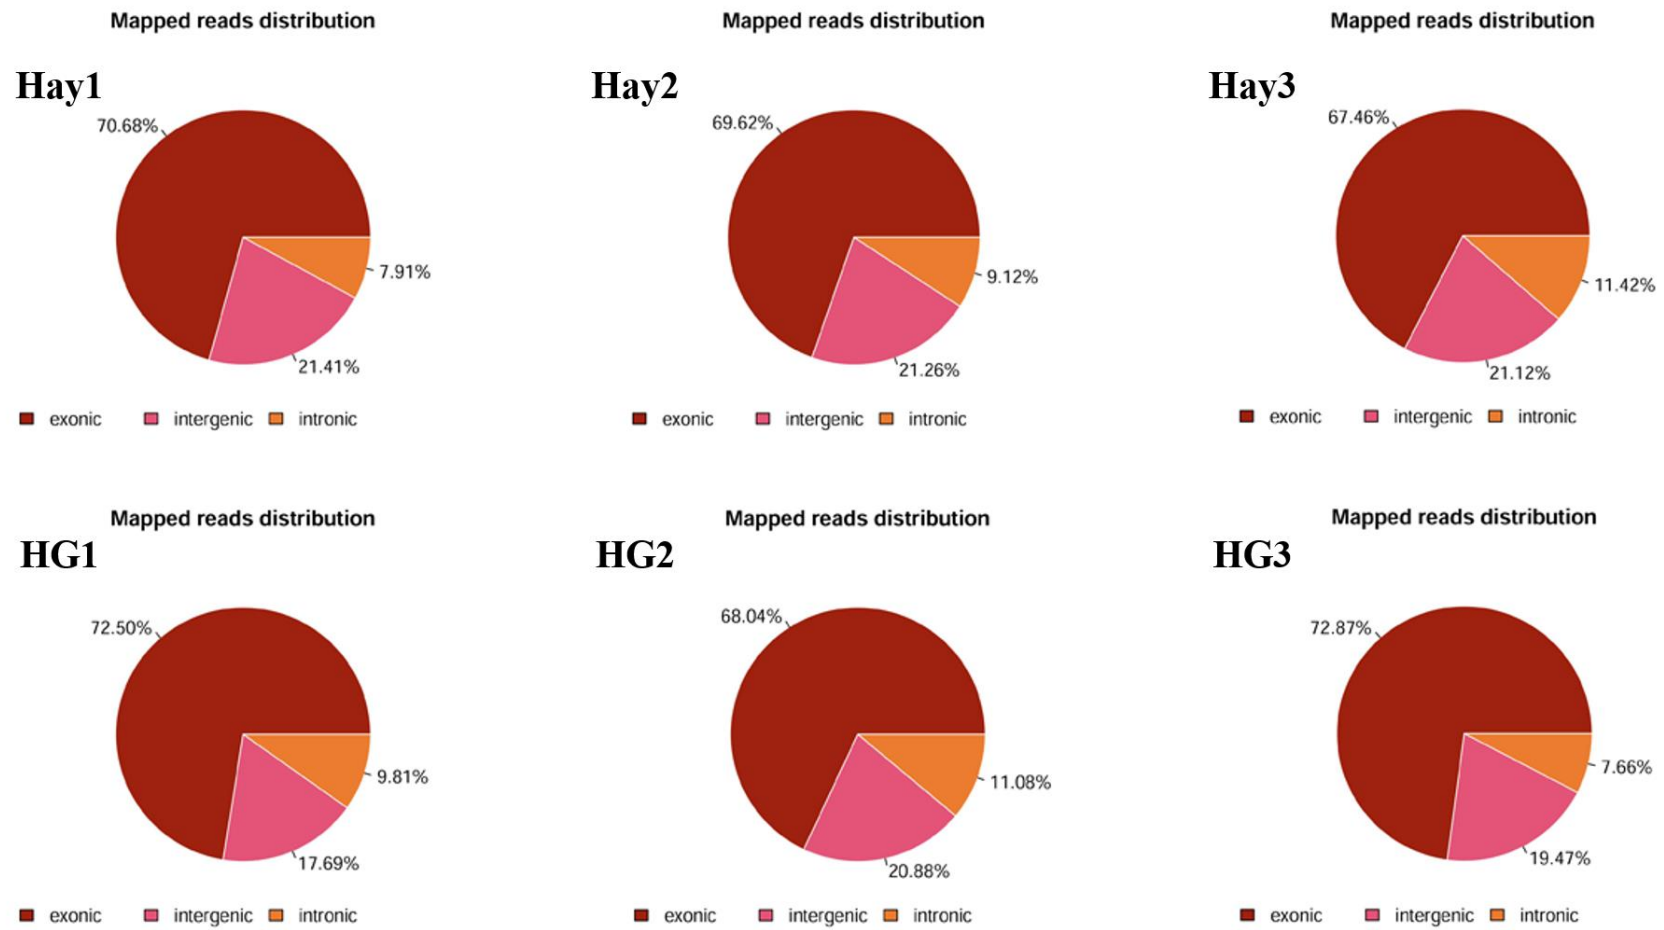

**Fig. S1. Distribution of reads mapped to the genome.** The brown, pink, and orange colors represent the exonic, intergenic, and intronic regions, respectively.

### proportion of transcripts

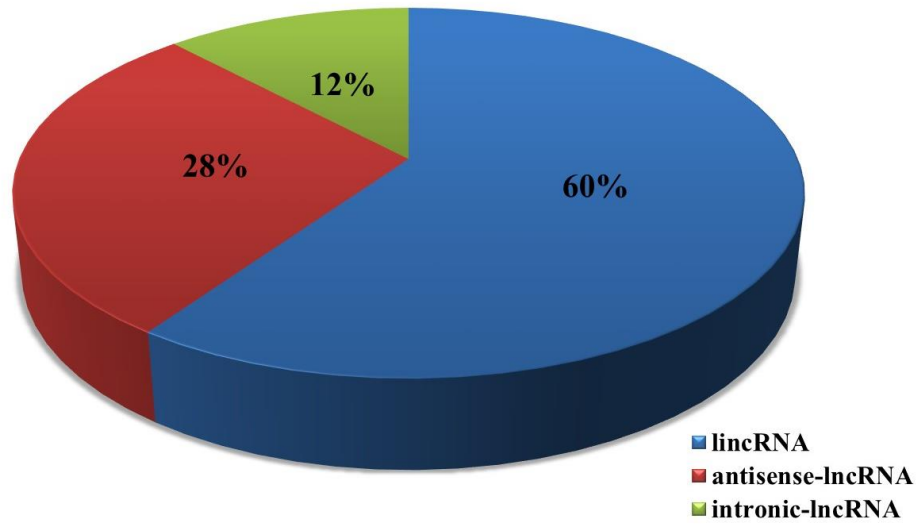

**Fig. S2. Classification and proportion of lincRNA transcripts.** The blue, red, and green colors represent lincRNA, antisense-lincRNA, and intronic-lincRNA, respectively.



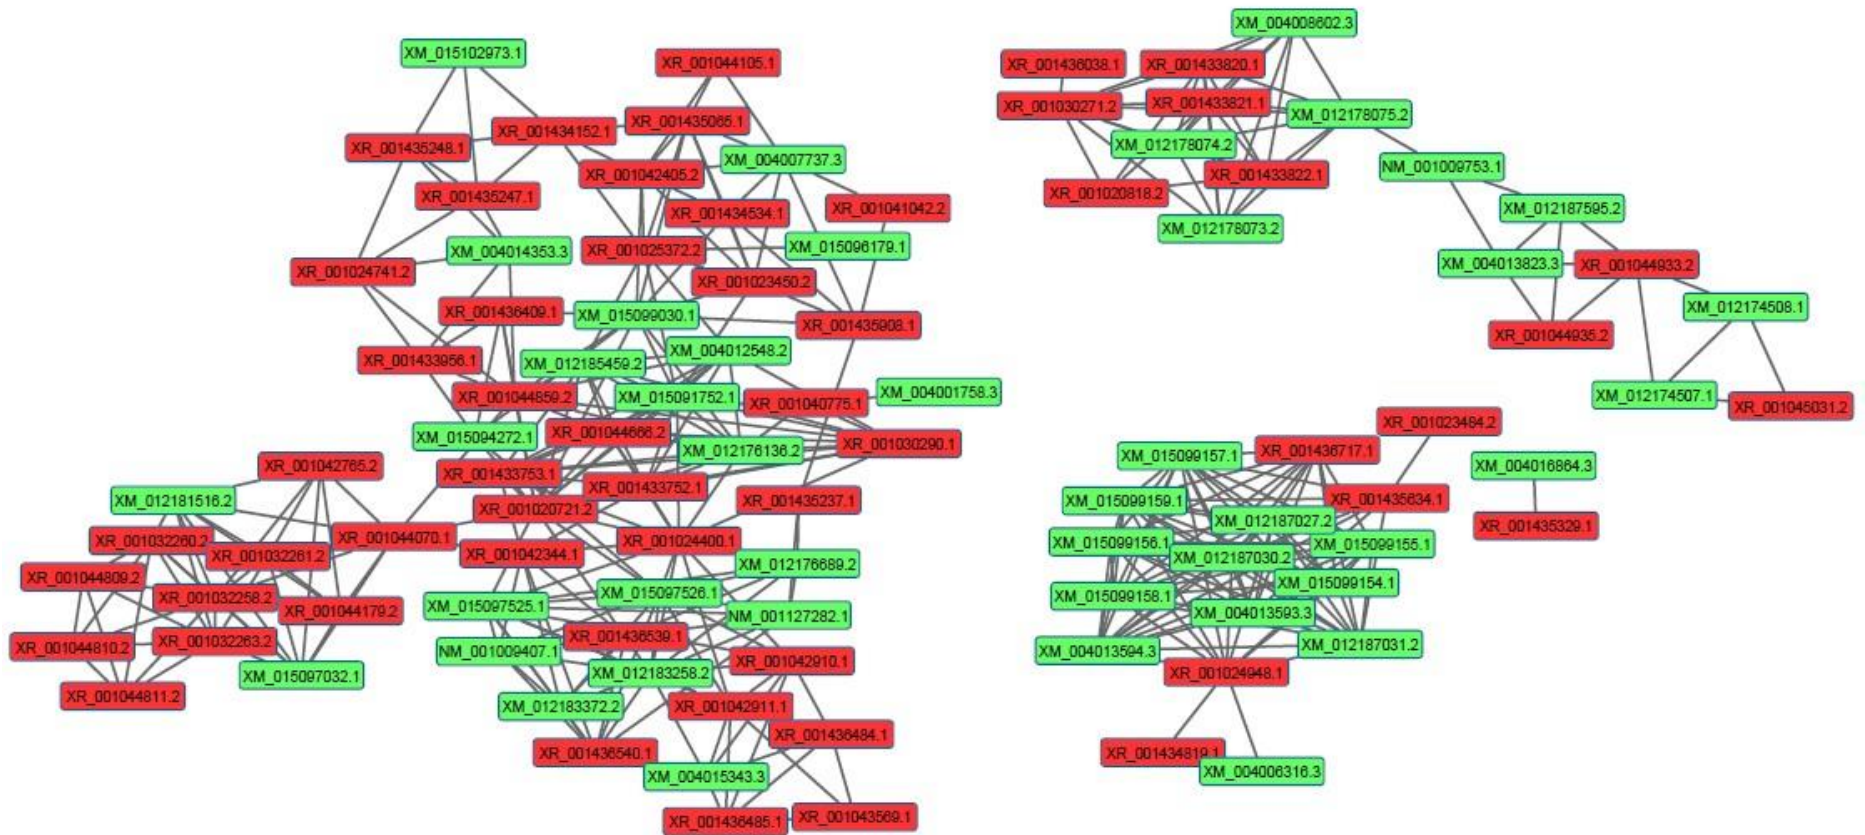

**Fig. S4. Network between 43 DE lncRNAs and 22 DE mRNAs.** mRNAs are shown in green and lncRNAs are shown in red.



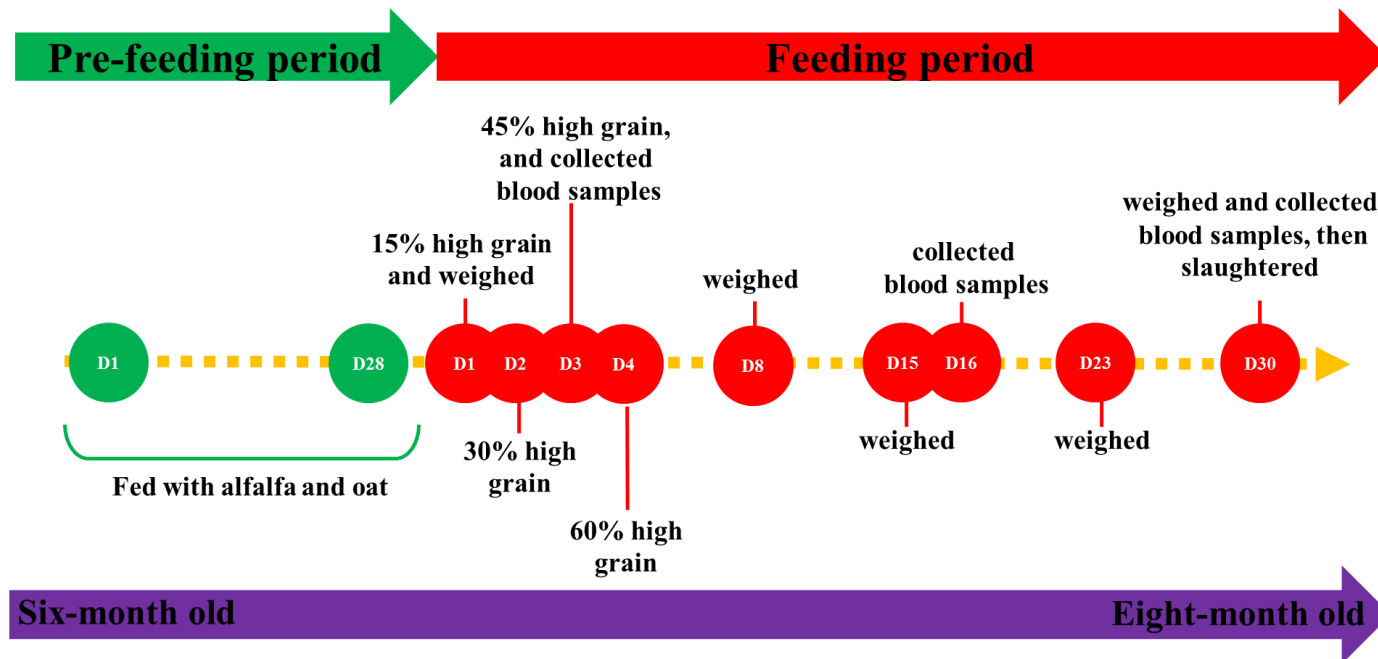

**Fig. S5. The feeding scheme of the experiment.** The diagram shows the feeding scheme used for the high grain group. The feeding scheme used for the hay group was similar to that used for the high grain group, except that the hay group was only fed alfalfa and oats during the experimental period.

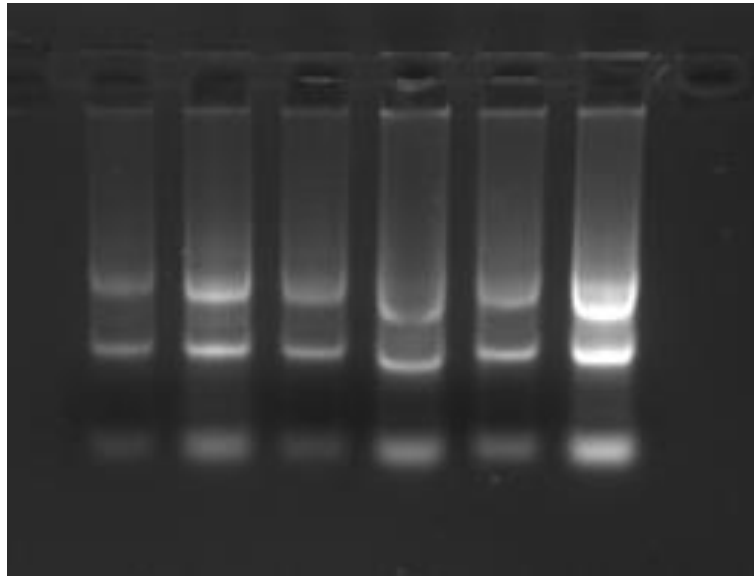

**Fig. S6. Agarose gel electrophoresis analysis of RNA-extracted products of sheep testis.**

The agarose gel electrophoresis was visualized under UV illumination with 50ms exposure time.

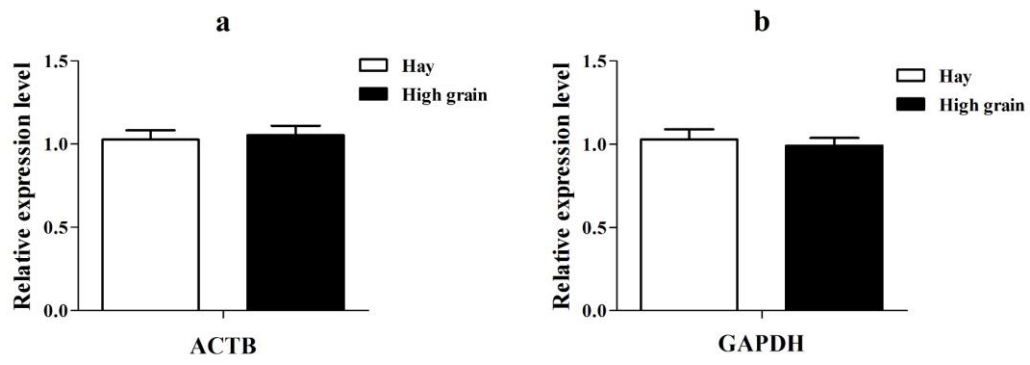

**Fig. S7.** Expression level of *ACTB* normalized to *GAPDH* (a) and expression level of *GAPDH* normalized to *ACTB* (b).

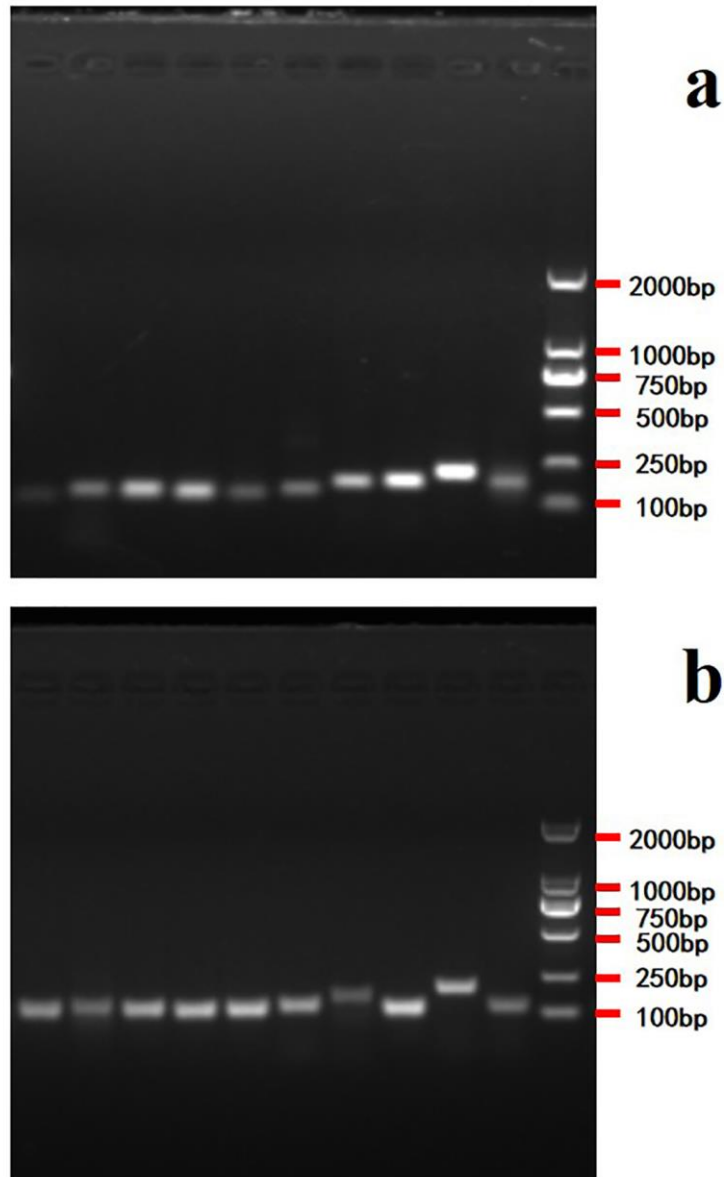

**Fig. S8. Agarose gel electrophoresis analysis of the primers of differentially expressed mRNAs and lncRNAs are shown in a and b, respectively.** The differentially expressed mRNAs and lncRNAs were chosen randomly from the sequencing data and the agarose gel electrophoresis was visualized under UV illumination with 50ms exposure time. The bands in part a represent XM\_004008021.3, XM\_012173604.2, XM\_004018909.3, XM\_004006316.3, XM\_004012176.3, XM\_012184864.2, XM\_004008307.3, XM\_015101162.1, XM\_015097032.1, and XM\_012104750.2 from left to right; in part b, the bands represent the differentially expressed lncRNAs: XR\_001045031.2, XR\_001040775.1, XR\_001434819.1, XR\_001044933.2, XR\_001044935.2, XR\_001044859.2, XR\_001435329.1, XR\_001025228.2, XR\_001043569.1, and XR\_001042765.2 from left to right.
